# Supplementary material
Source: publisher figshare collection journal article supplement (https://karger.figshare.com/ndownloader/files/7580518)
Supplement: Supplementary file 1 [file 7580518]

## Sheet: Sheet1
Table S6. Top 10 highly expressed miRNAs in the three samples
miRNA name	Raw reads			total	Normalized reads (TPM)
	female	intersex	male		female	intersex	male
mal-miR-143	154862	123377	730747	1008986	63240.5	72913	189047
mal-miR-181a	271759	182587	268839	723185	110977	107905	69549.6
maL-Let-7a	163890	115313	288655	567858	66927.3	68147.3	74676.1
maL-Let-7c	160800	118849	279676	559325	65665.4	70237	72353.2
maL-Let-7f	159872	113169	268790	541831	65286.5	66880.3	69536.9
maL-Let-7g	145725	101753	251776	499254	59509.3	60133.7	65135.3
mal-miR-26a	90347	68819	170317	329483	36894.7	40670.5	44061.6
mal-miR-10b	73088	54883	168695	296666	29846.7	32434.6	43642
mal-miR-21	81364	48245	85214	214823	33226.4	28511.7	22045.2
mal-miR-9	62645	48794	64653	176092	25582.2	28836.1	16726
